# Supplementary material
Source: PubMed Central journal article supplement (PMC1599965)
Supplement: pnas_0606480103_7.pdf [file pnas_0606480103_7.pdf]

**Table 2. Crystallographic data statistics**

| <b>Data collection statistics</b>              |                             |                            |                                                                      |                        |                  |                           |                  |
|------------------------------------------------|-----------------------------|----------------------------|----------------------------------------------------------------------|------------------------|------------------|---------------------------|------------------|
| <u>Crystal</u>                                 | <u>Space group</u>          |                            | <u>Cell dimensions</u>                                               |                        |                  |                           |                  |
| Native                                         | P6 <sub>5</sub> 22          |                            | $a = 185.0 \text{ \AA}, b = 185.0 \text{ \AA}, c = 67.7 \text{ \AA}$ |                        |                  |                           |                  |
| SeMet                                          | P6 <sub>5</sub> 22          |                            | $a = 185.2 \text{ \AA}, b = 185.2 \text{ \AA}, c = 68.3 \text{ \AA}$ |                        |                  |                           |                  |
| <u>Data set</u>                                | <u>d<sub>min</sub>, \AA</u> | <u>No. of measurements</u> | <u>No. of unique reflections</u>                                     | <u>Completeness, %</u> | <u>I/σ</u>       | <u>R<sub>sym</sub>, %</u> |                  |
| Native                                         | 3.1                         | 128,504                    | 12,651                                                               | 98.5 (98.1)            | 13 (2.7)         | 6.9 (46.9)                |                  |
| SeMet λ1 (peak)                                | 3.2                         | 248,283                    | 11,812                                                               | 99.5 (98.9)            | 15 (5.7)         | 6.4 (48.3)                |                  |
| SeMet λ2 (edge)                                | 3.2                         | 153,292                    | 11,692                                                               | 98.3 (93.8)            | 14 (3.9)         | 6.5 (53.8)                |                  |
| SeMet λ3 (remote)                              | 3.2                         | 155,029                    | 11,703                                                               | 98.3 (94.2)            | 14 (3.5)         | 5.8 (59.7)                |                  |
| <b>MAD phasing statistics</b>                  |                             |                            |                                                                      |                        |                  |                           |                  |
|                                                |                             | <u>Peak</u>                |                                                                      | <u>Edge</u>            |                  | <u>Remote</u>             |                  |
|                                                |                             | <u>Isomorphous</u>         | <u>Anomalous</u>                                                     | <u>Isomorphous</u>     | <u>Anomalous</u> | <u>Isomorphous</u>        | <u>Anomalous</u> |
| Phasing power                                  | Centric                     | –                          | –                                                                    | 0.476                  | –                | 0.615                     | –                |
|                                                | Acentric                    | –                          | 2.554                                                                | 0.542                  | 1.179            | 0.734                     | 1.666            |
| FOM                                            | Centric                     | 0.198                      |                                                                      |                        |                  |                           |                  |
|                                                | Acentric                    | 0.415                      |                                                                      |                        |                  |                           |                  |
| FOM after DM                                   | 0.856                       |                            |                                                                      |                        |                  |                           |                  |
| <b>Refinement statistics (native data set)</b> |                             |                            |                                                                      |                        |                  |                           |                  |
| No. of reflections (working/test)              | 10,286 / 1,185              |                            |                                                                      |                        |                  |                           |                  |
| No. of nonhydrogen atoms                       | 1,805                       |                            |                                                                      |                        |                  |                           |                  |
| Resolution, \AA                                | 8.0-3.1                     |                            |                                                                      |                        |                  |                           |                  |
| R <sub>cryst</sub> / R <sub>free</sub> , %     | 26.8 / 31.6                 |                            |                                                                      |                        |                  |                           |                  |
| Bond length deviation, \AA                     | 0.008                       |                            |                                                                      |                        |                  |                           |                  |
| Bond angle deviation, °                        | 1.5                         |                            |                                                                      |                        |                  |                           |                  |

Values in parentheses are for the highest-resolution bin.

$R_{\text{sym}} = \sum_h \sum_i |I_i(h) - \langle I(h) \rangle| / \sum_h \langle I(h) \rangle$ , where  $I_i(h)$  is the  $i$ th measurement and  $\langle I(h) \rangle$  is the weighted mean of all measurements of  $I(h)$ .

Phasing power =  $\langle |F_H(\text{calc})| \rangle / \langle E \rangle$ , where  $E$  is the phase-integrated lack of closure. FOM, figure of merit. FOM after DM, figure of merit after solvent flipping in the program DM.

$R = \sum (|F_{\text{obs}}| - K|F_{\text{calc}}|) / \sum |F_{\text{obs}}|$ .  $R_{\text{free}}$  is the  $R$  value obtained for a test set of reflections that consisted of a randomly selected 8% subset of the diffraction data used during refinement of  $\sigma_A$  value calculations.
