# Supplementary material
Source: PubMed Central journal article supplement (PMC1599965)

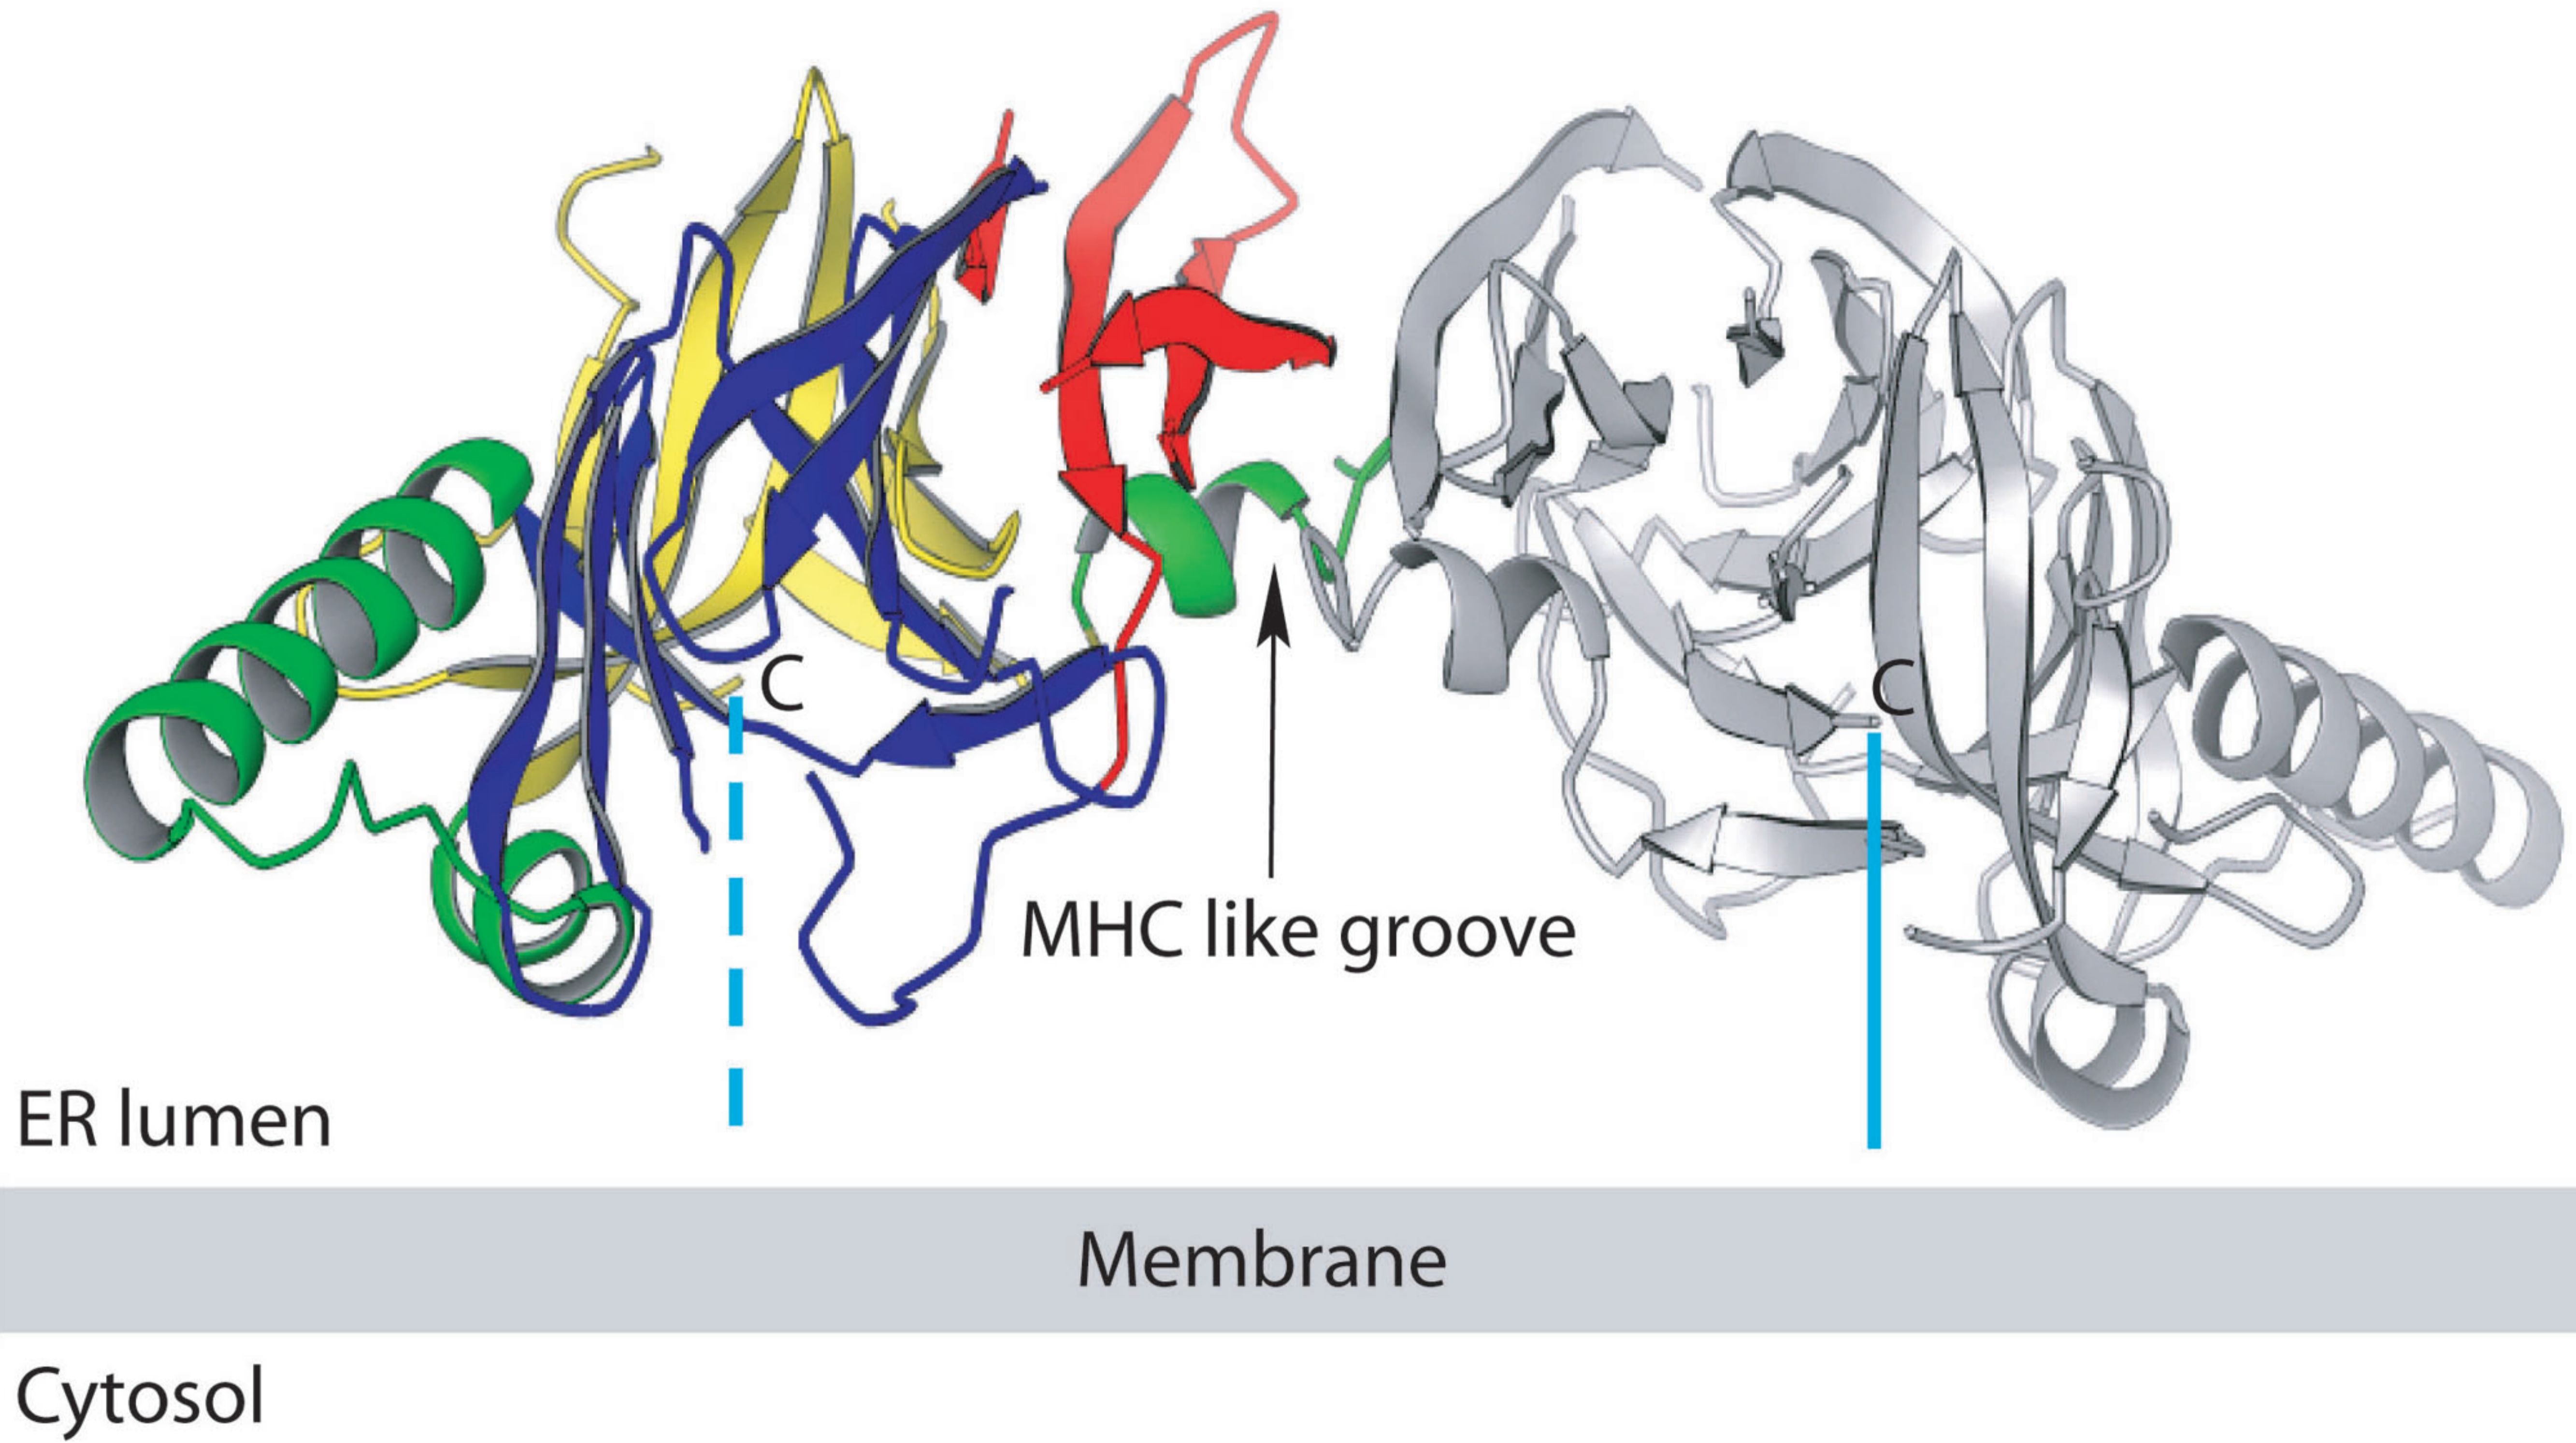

Supplement: pnas_0606480103_1.pdf [file pnas_0606480103_1.pdf]

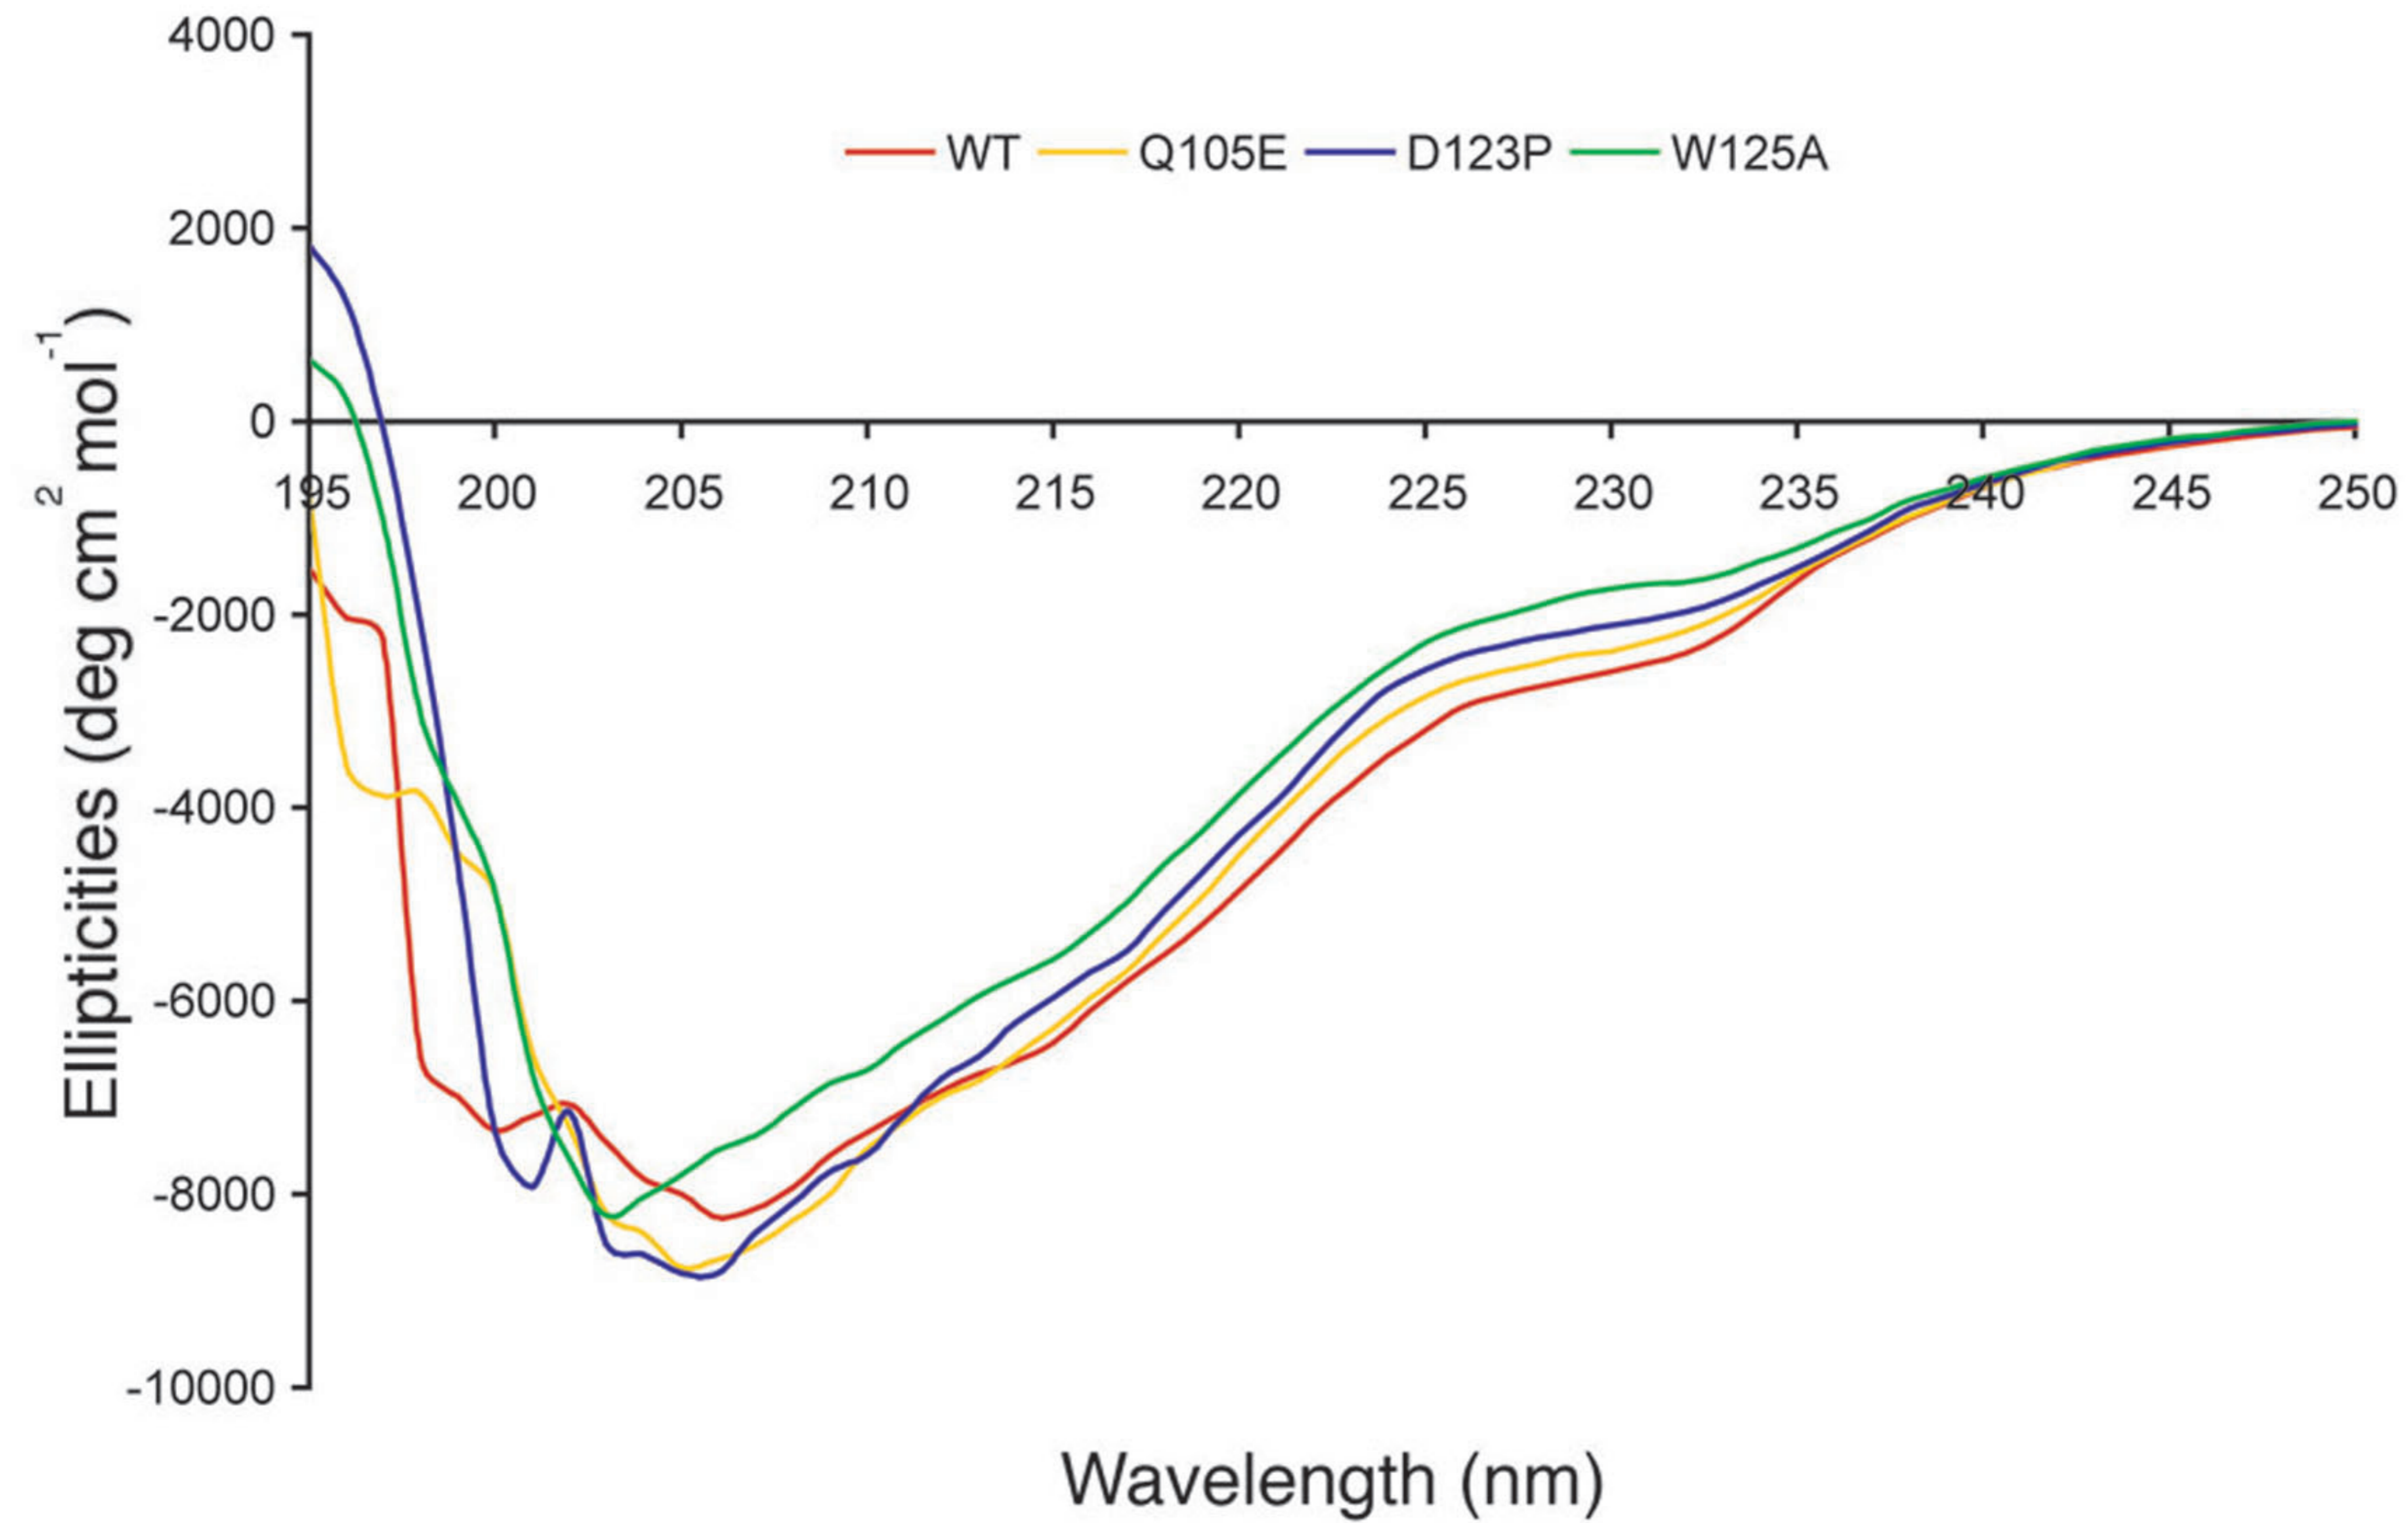

Supplement: pnas_0606480103_2.pdf [file pnas_0606480103_2.pdf]

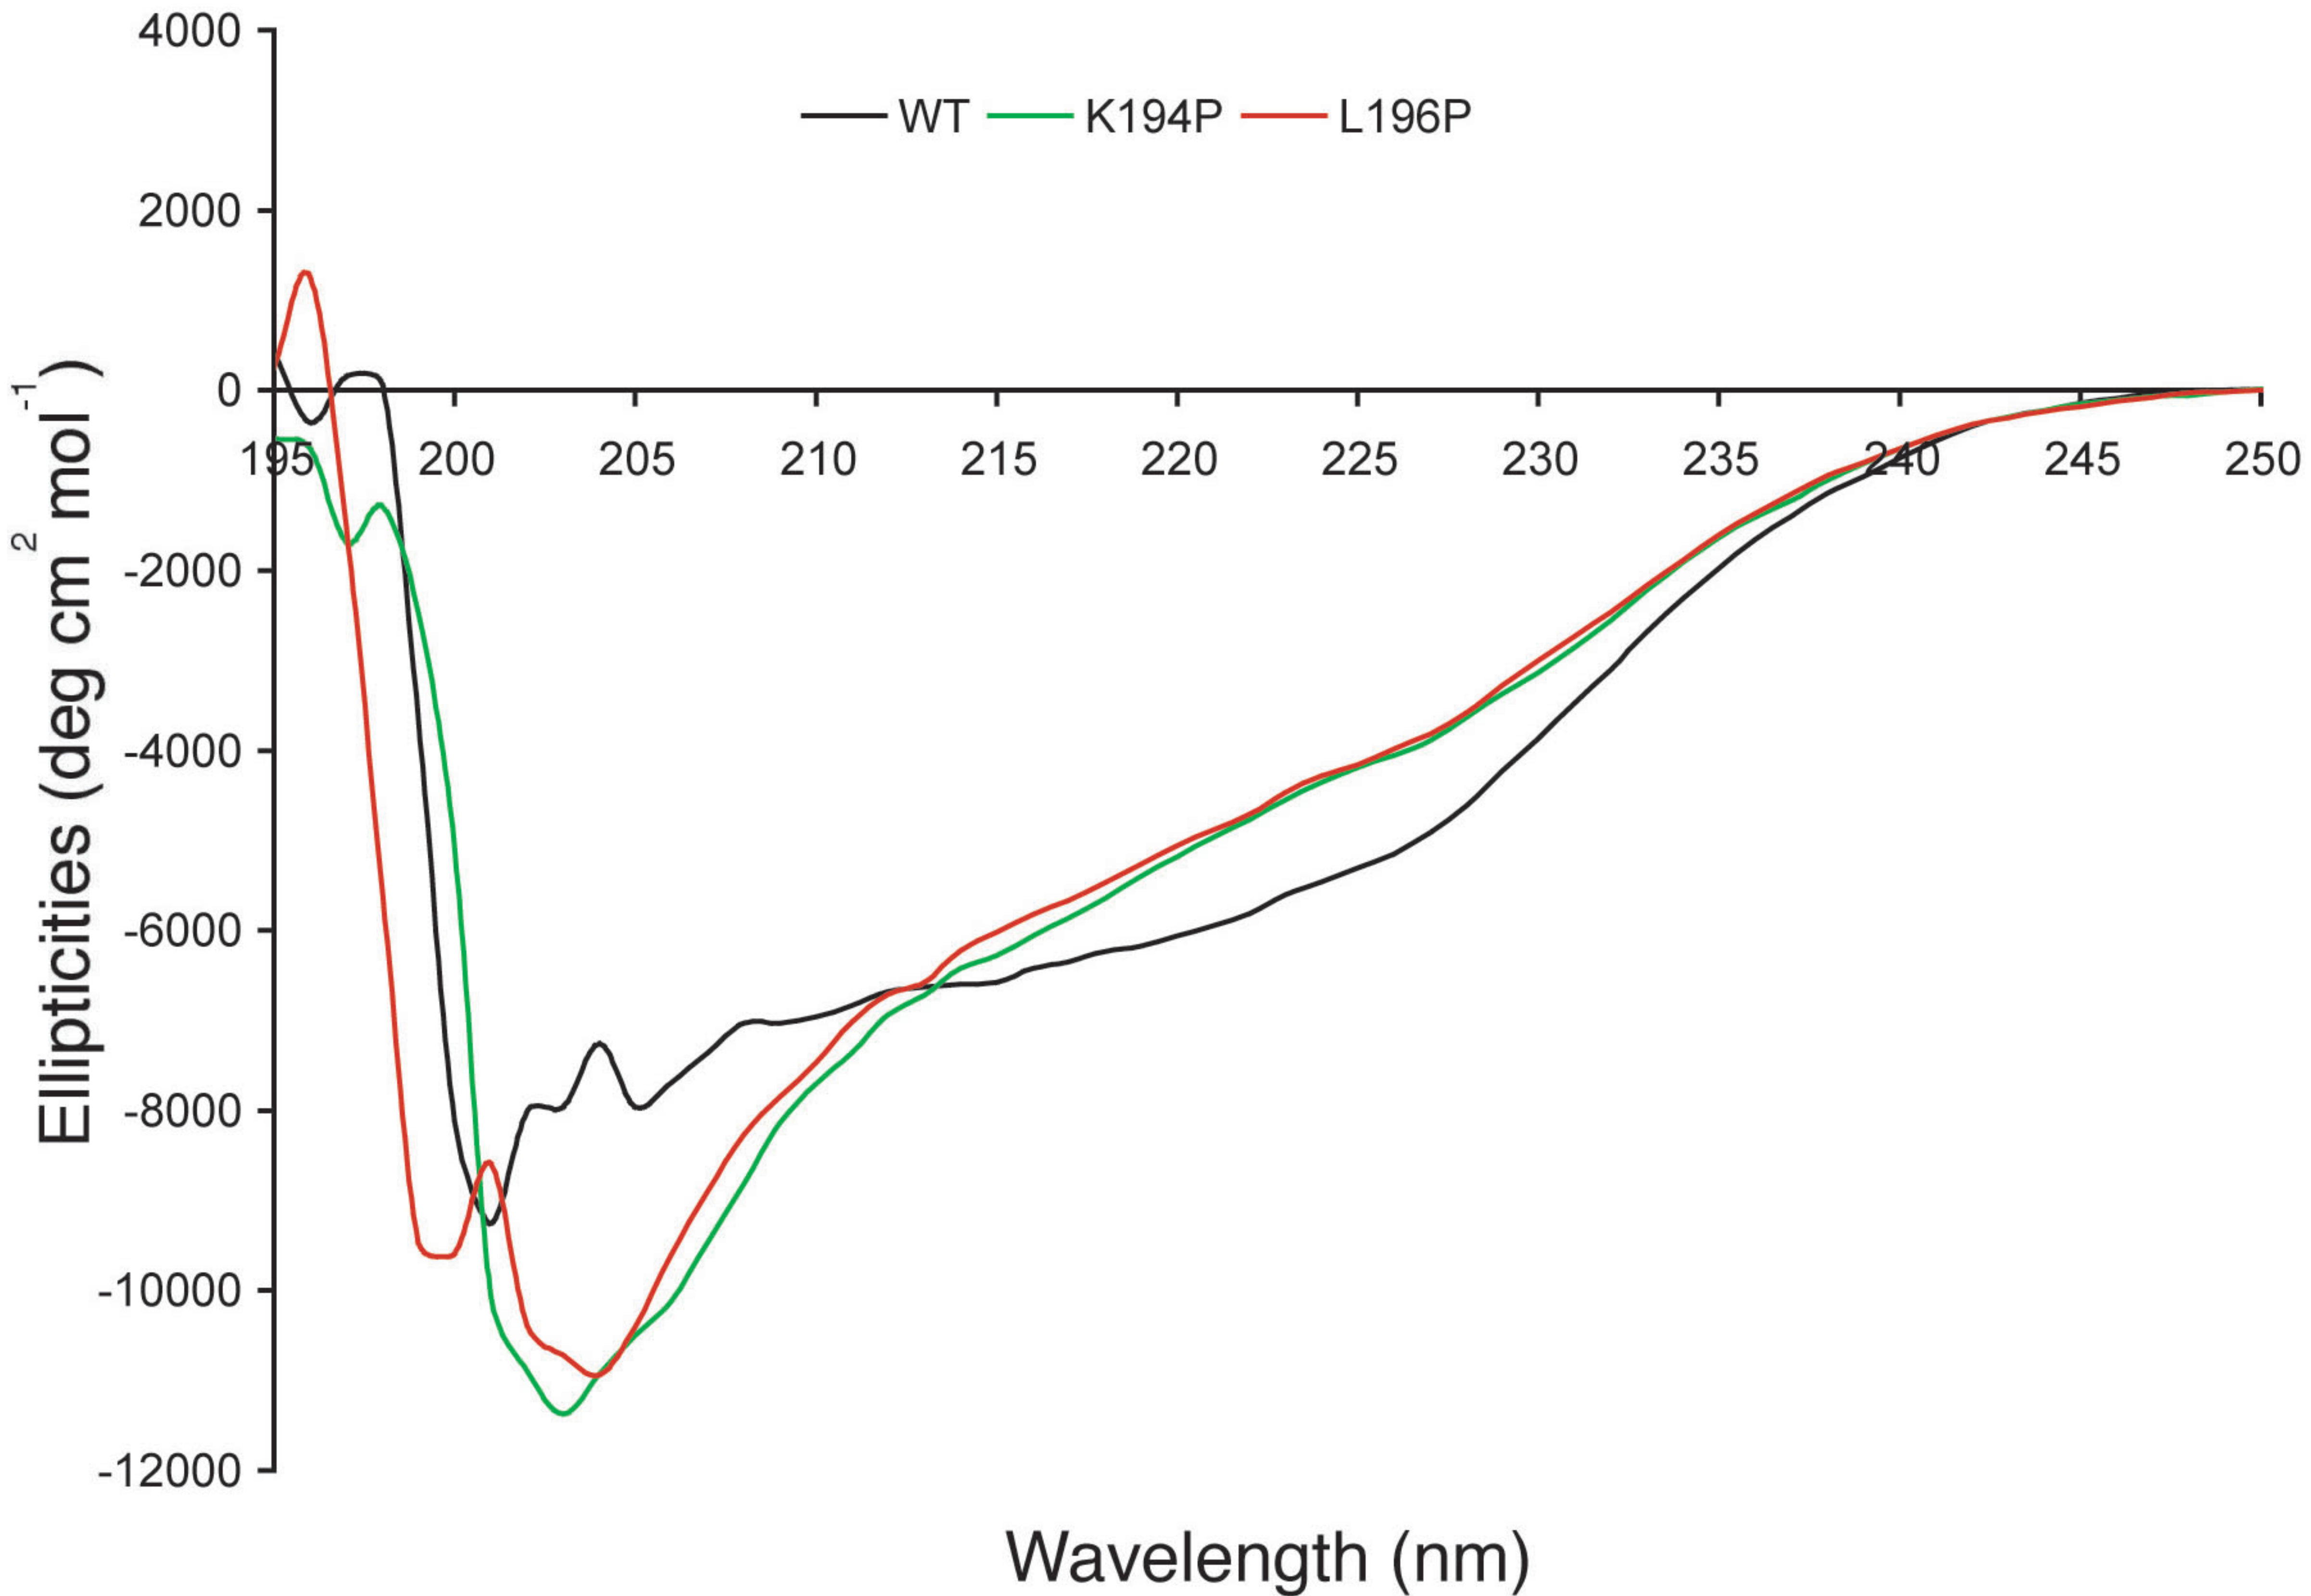

Supplement: pnas_0606480103_3.pdf [file pnas_0606480103_3.pdf]

milliunits  $\beta$ -gal/mg protein

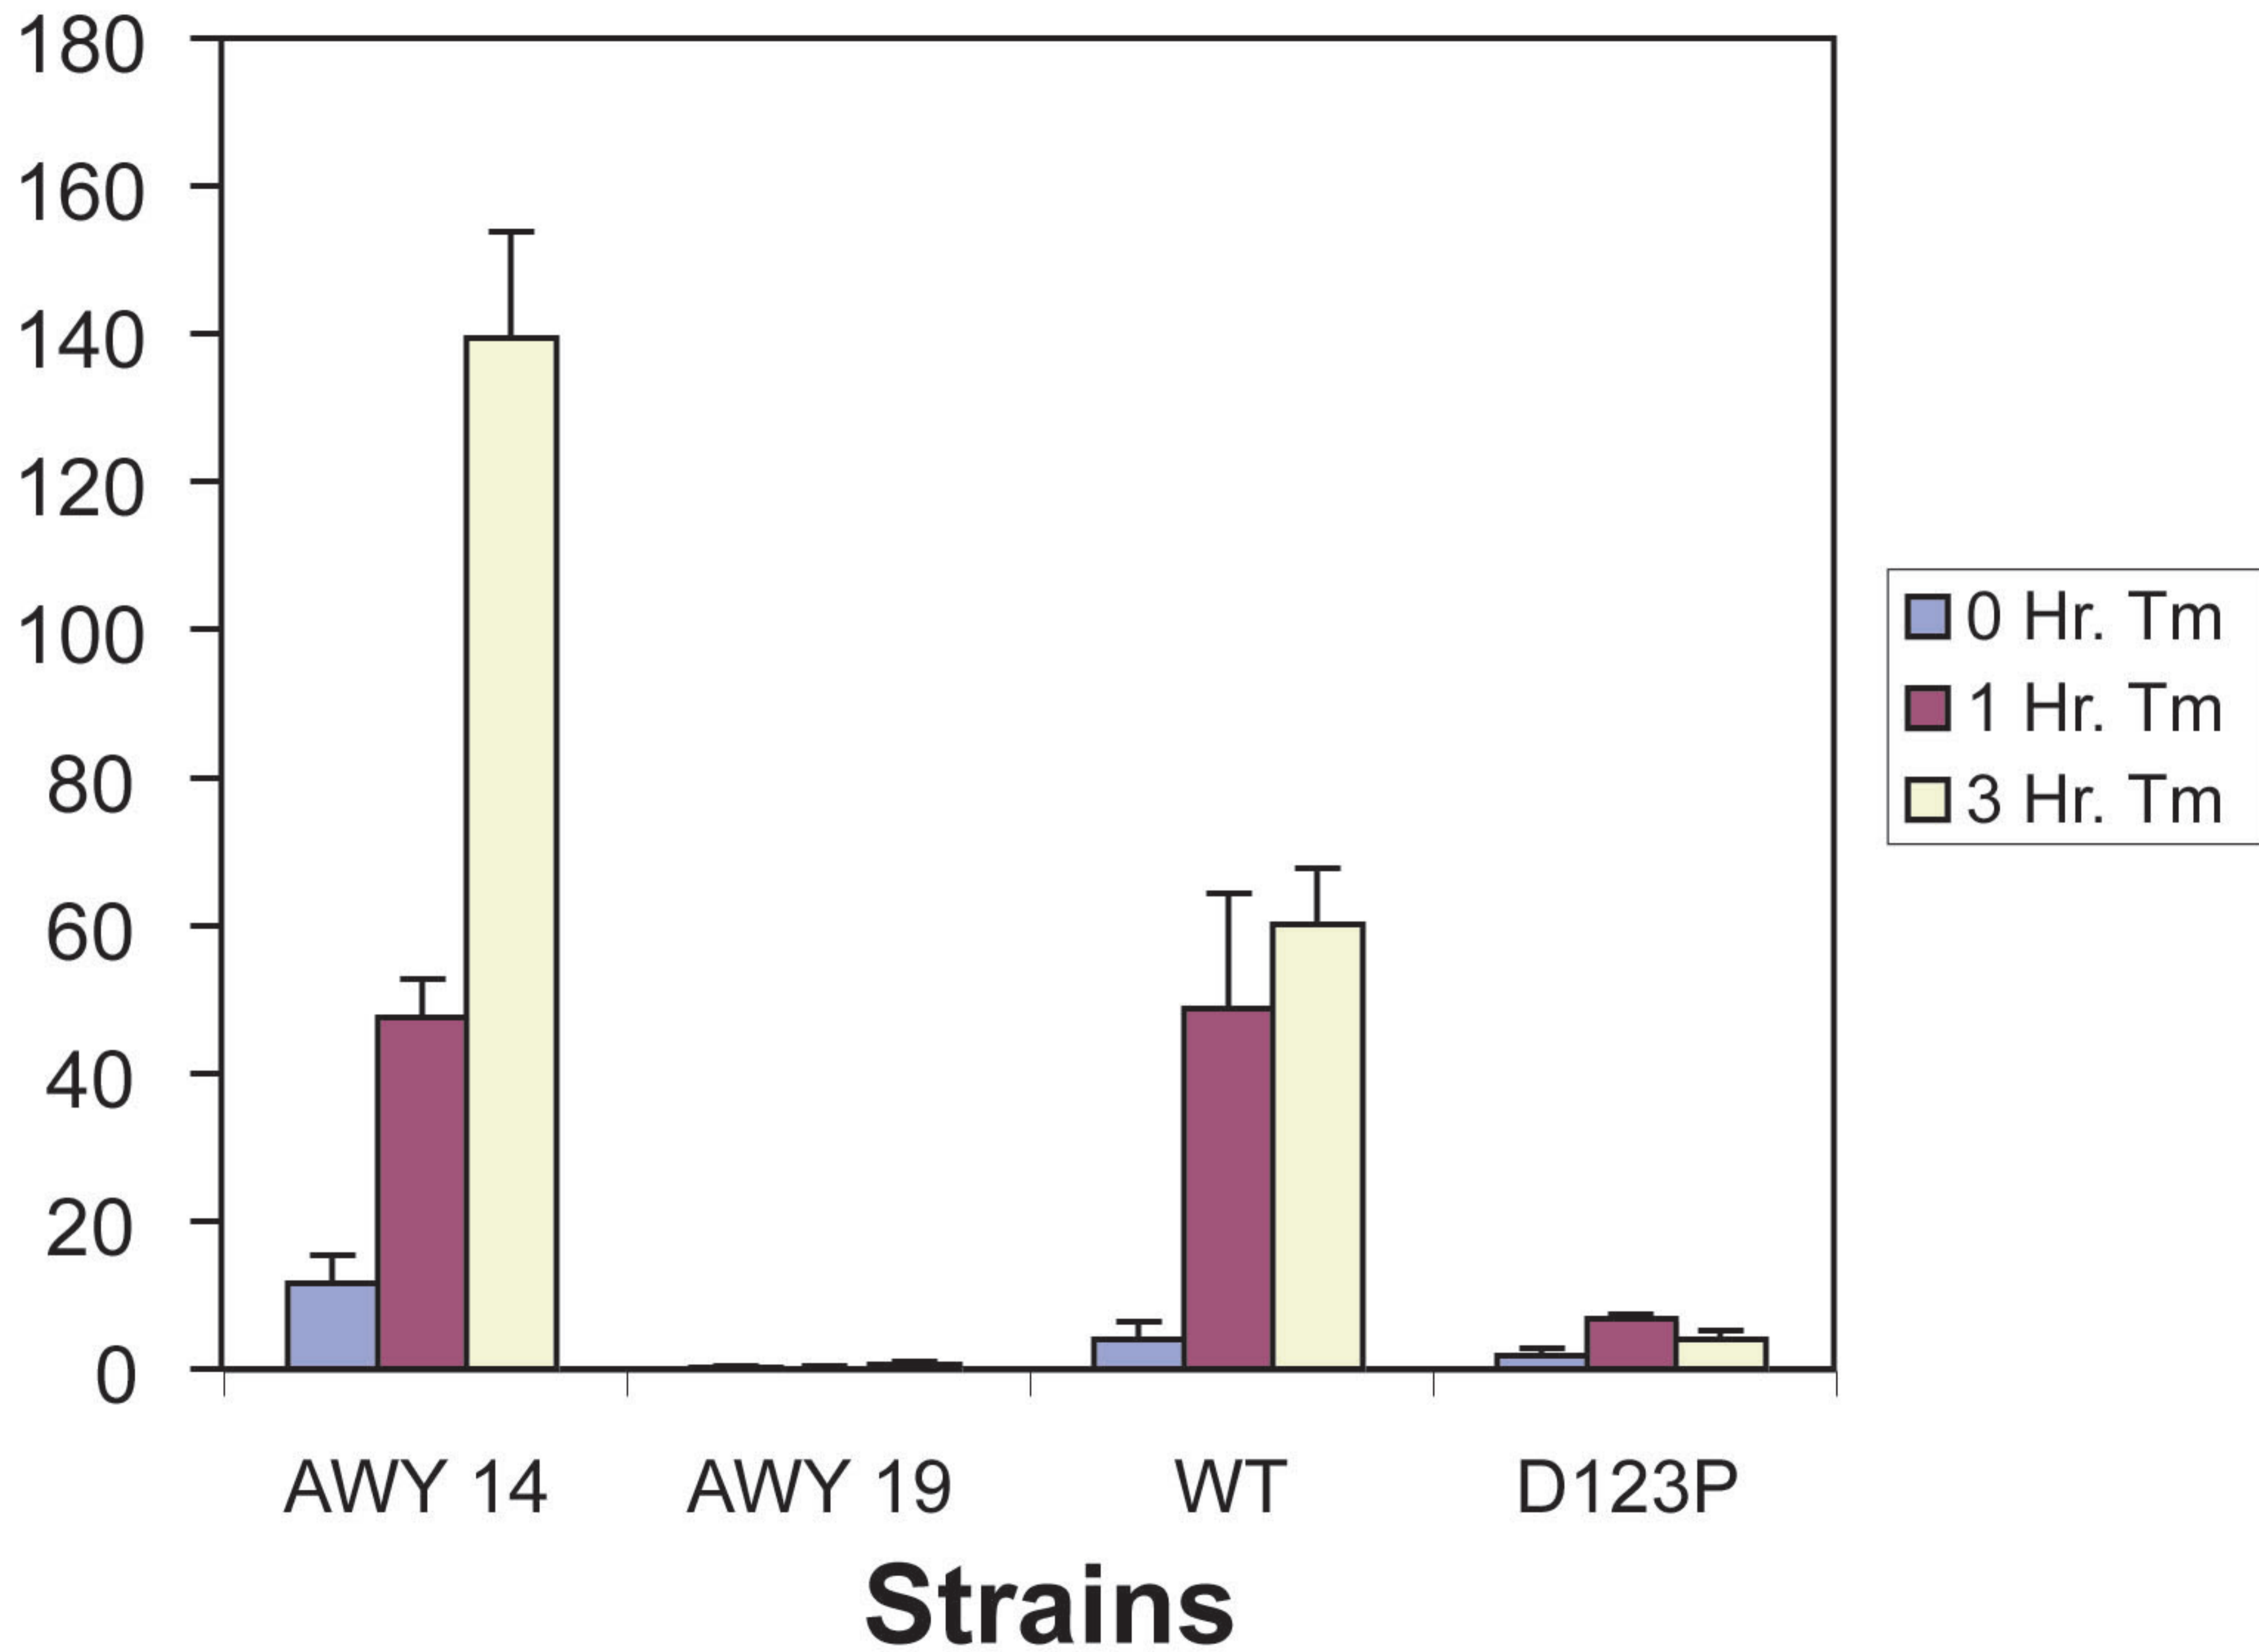

Supplement: pnas_0606480103_4.pdf [file pnas_0606480103_4.pdf]

A

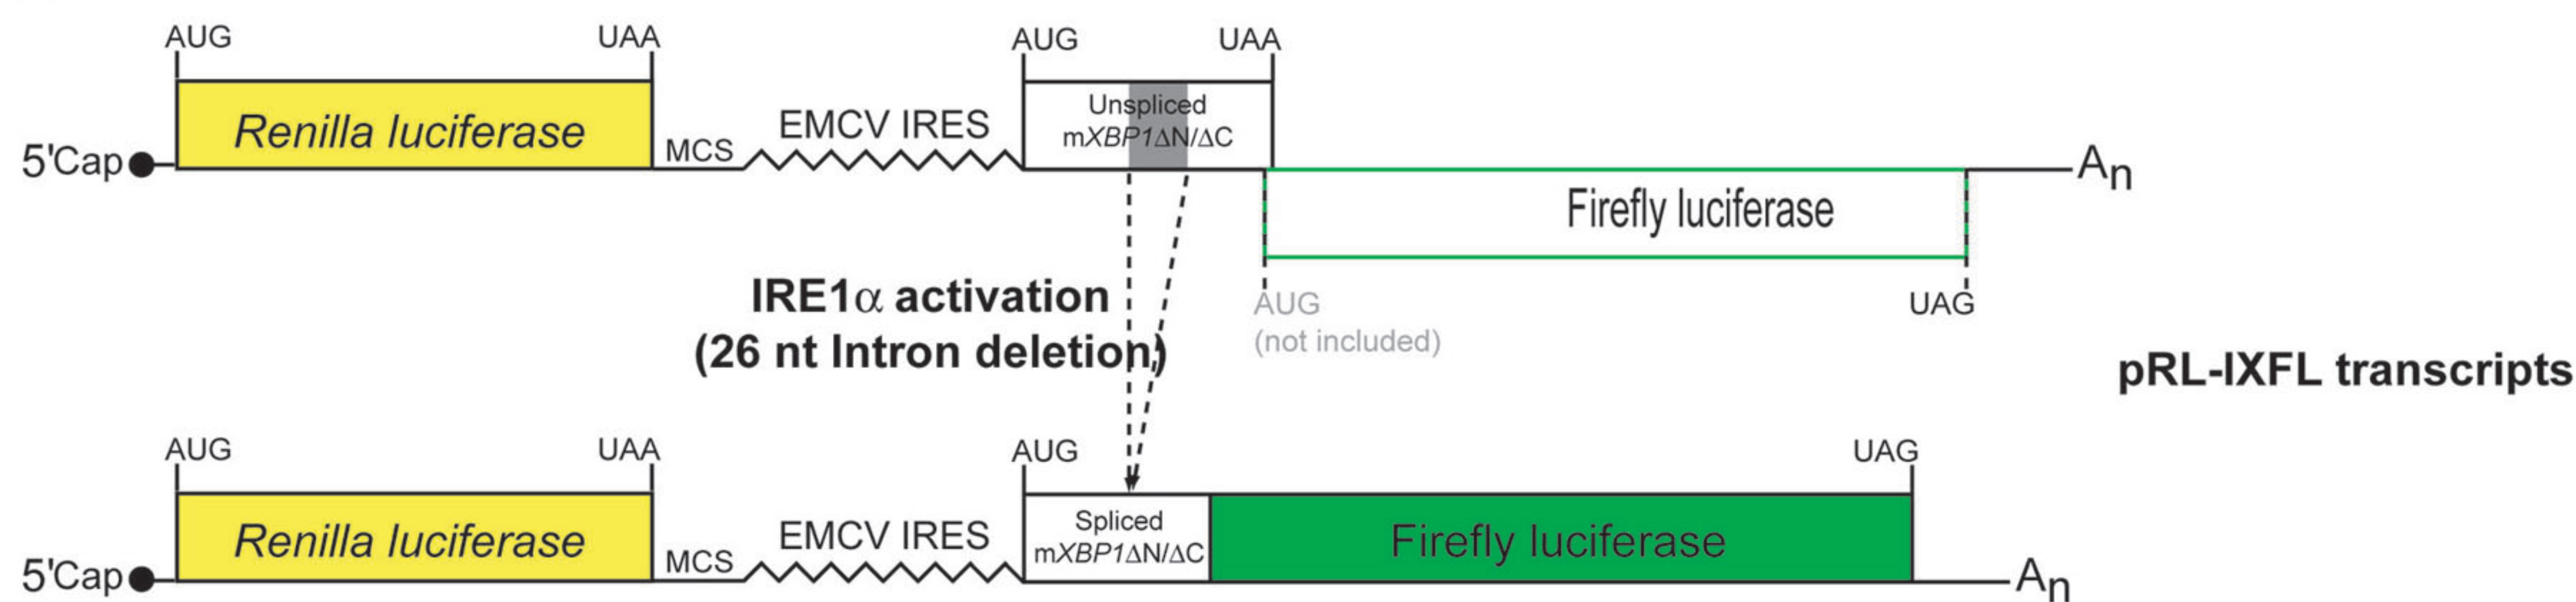

B

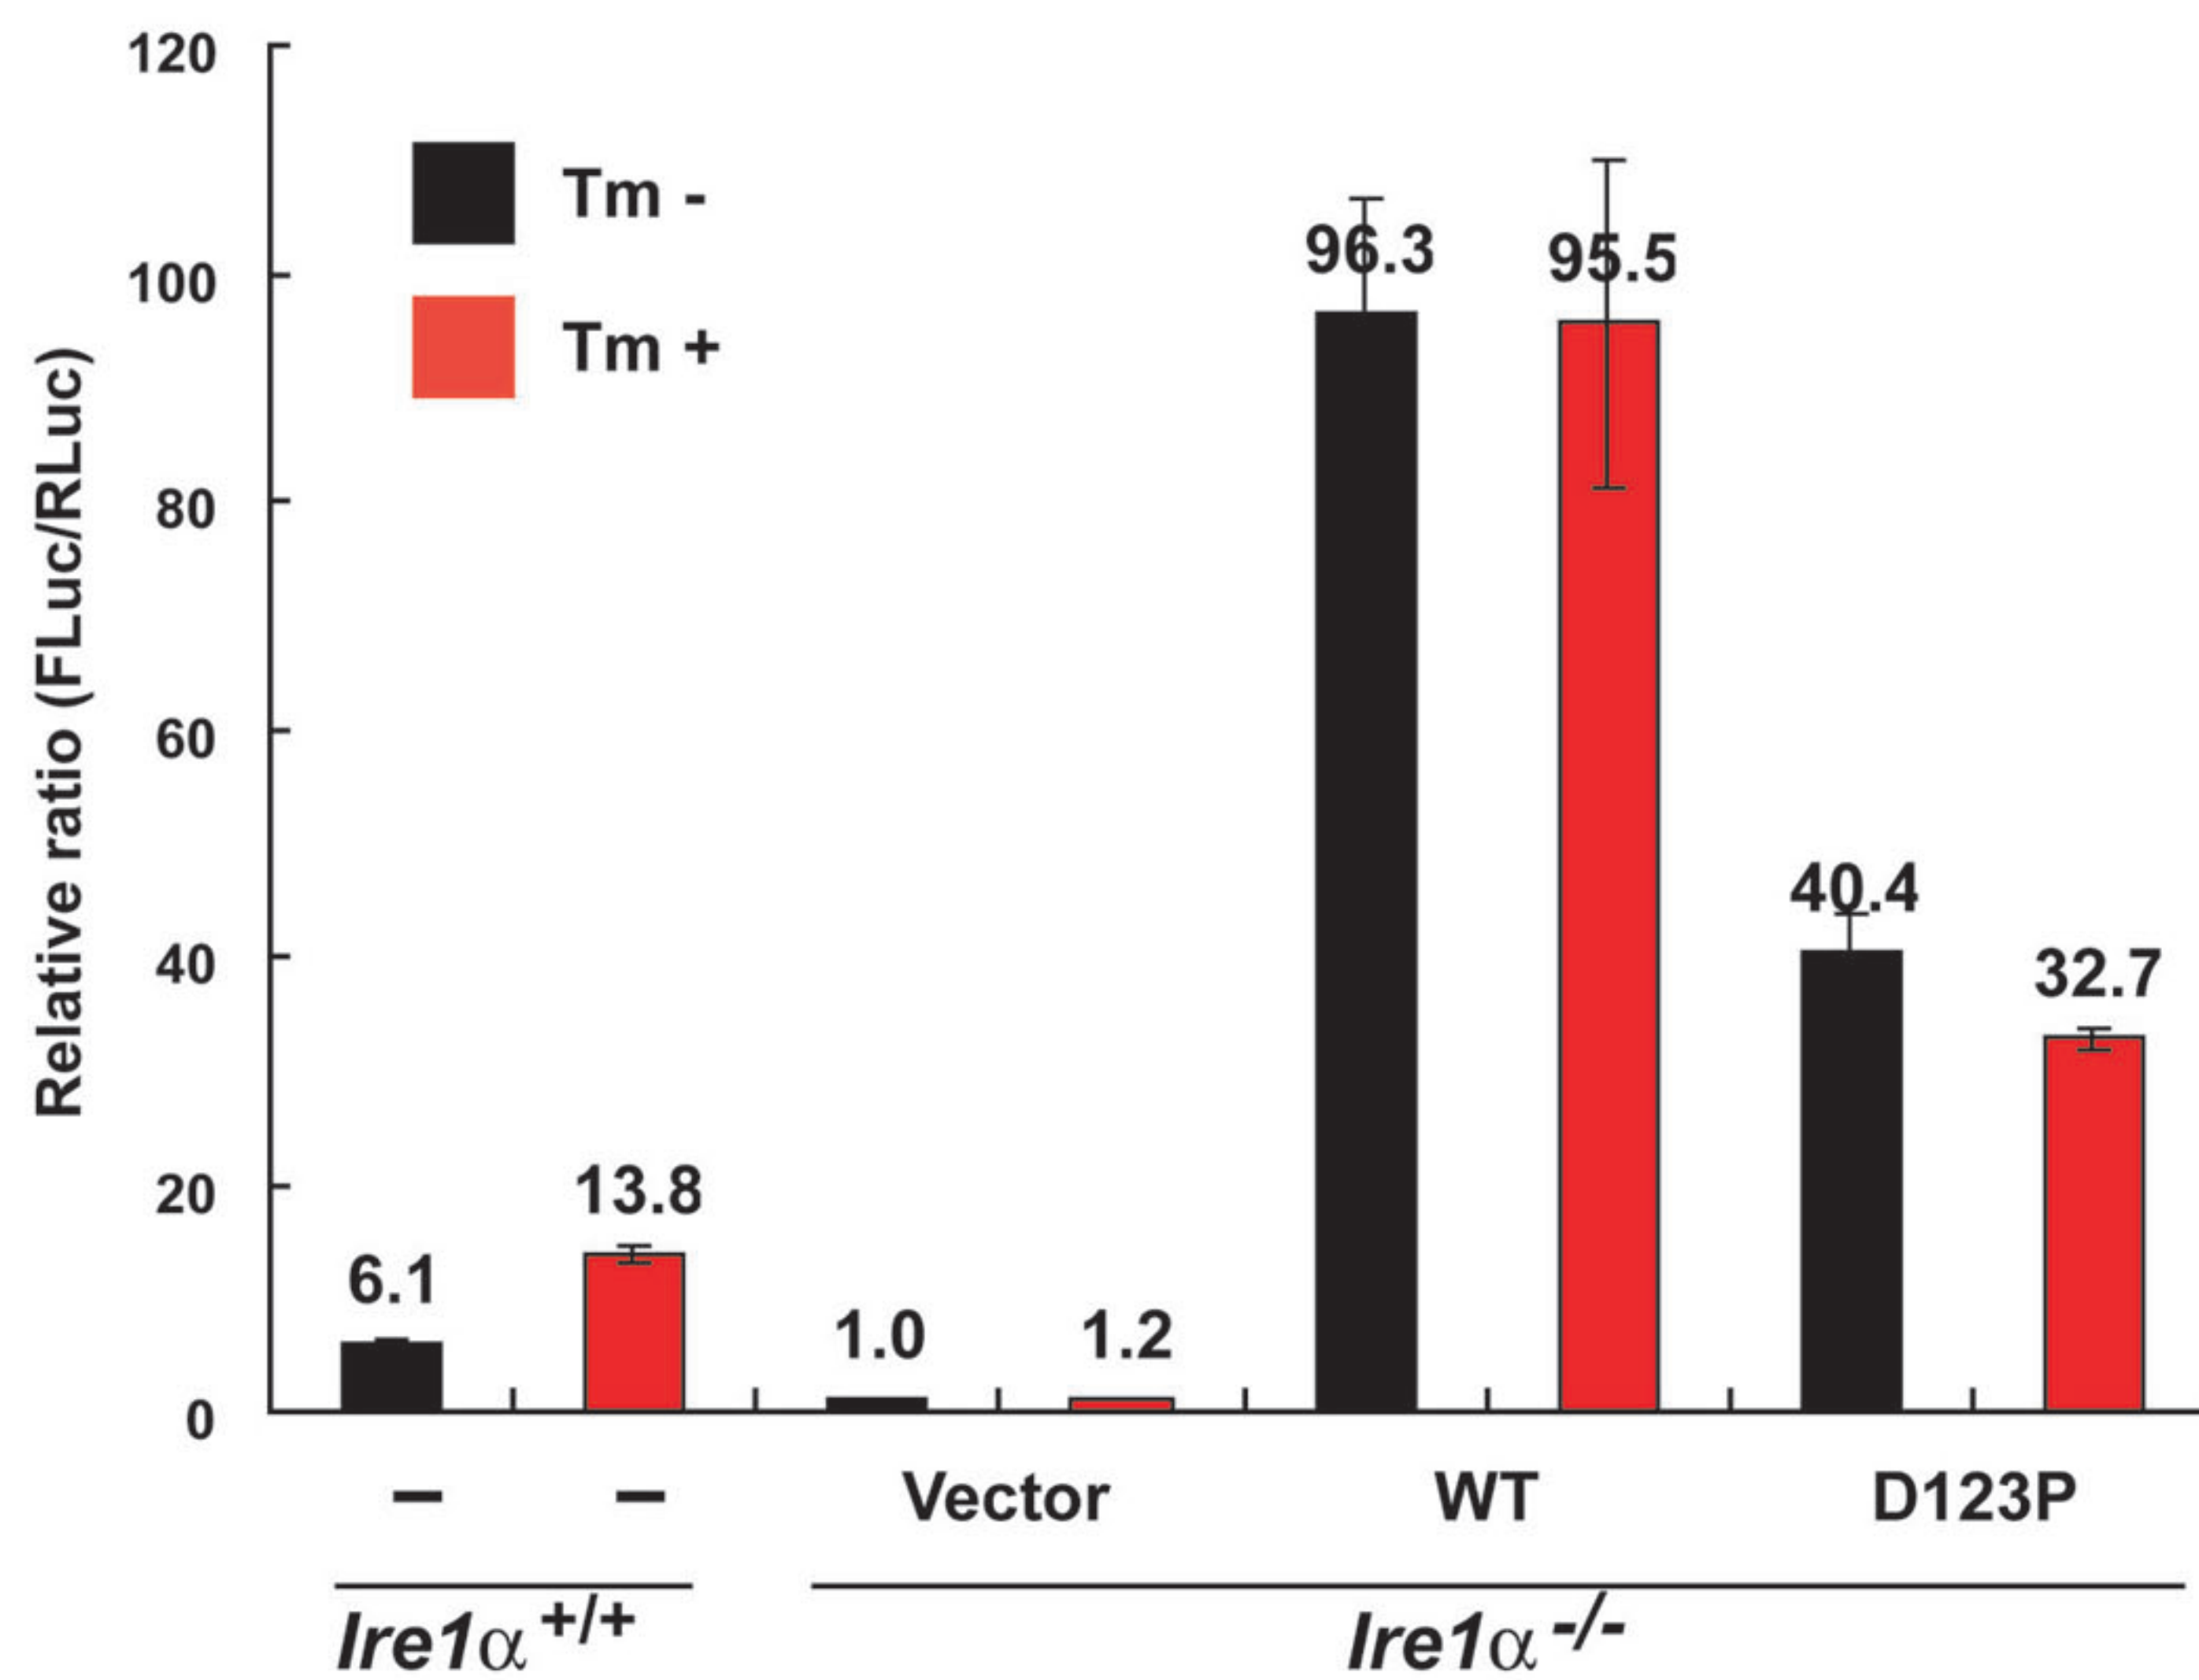

C

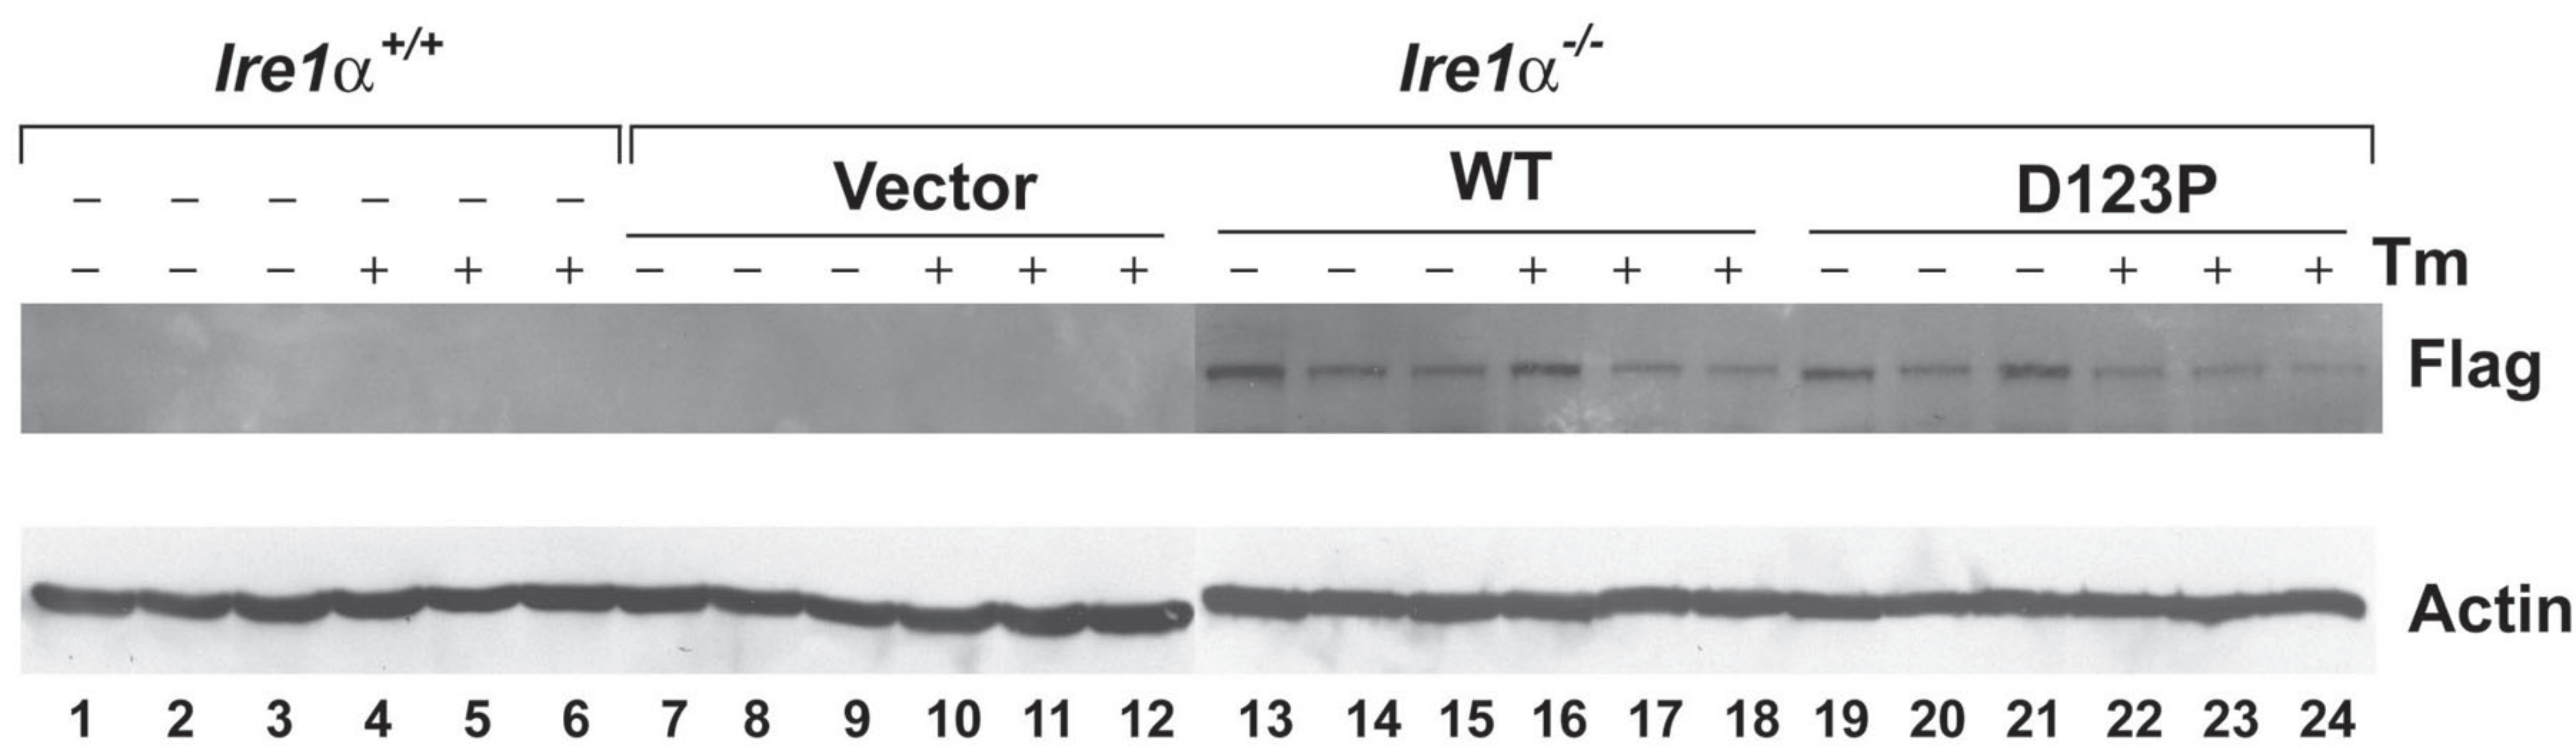

Supplement: pnas_0606480103_5.pdf [file pnas_0606480103_5.pdf]

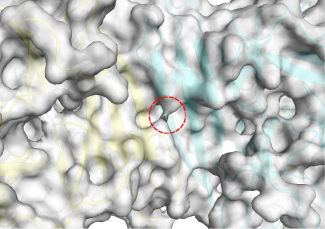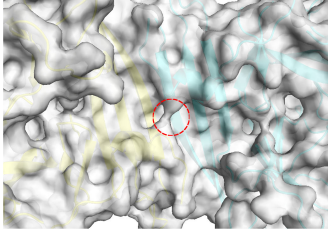

Supplement: pnas_0606480103_6.pdf [file pnas_0606480103_6.pdf]
